# Supplementary material for: A novel approach of utilizing quaternized chitosan as a catalyst for the eco-friendly cycloaddition of epoxides with CO2
Source: Royal Society of Chemistry journal article supplement (doi:10.1039/c2cy20137b), 2012-01-01
Supplement: c2cy20137b.pdf [file c2cy20137b.pdf]

**A novel approach of utilizing quaternized chitosan as a catalyst for the eco-friendly cycloaddition of epoxides with CO<sub>2</sub>**

Jose Tharun, Yeseul Hwang, Roshith Roshan, Sohyun Ahn, Amal Cherian Kathalikkattil and

Dae-Won Park\*

*Division of Chemical and Biomolecular Engineering, Pusan National University, Busan 609-735, Korea*

*\*Corresponding author: [dwpark@pusan.ac.kr](mailto:dwpark@pusan.ac.kr)*

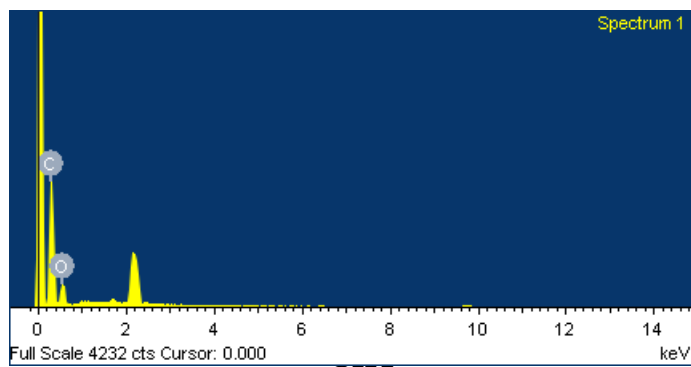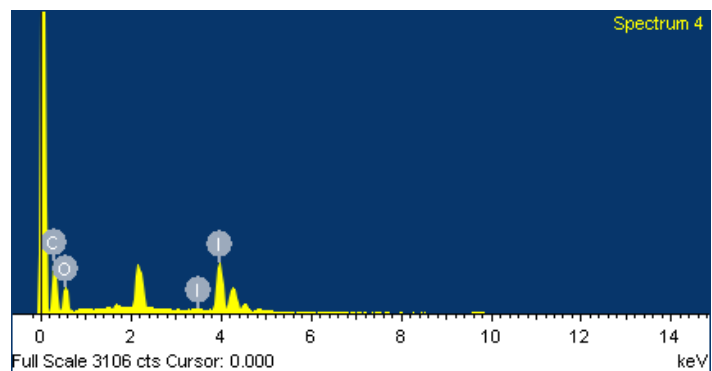

**Fig. S1.** EDS spectra of CHT and QCHT

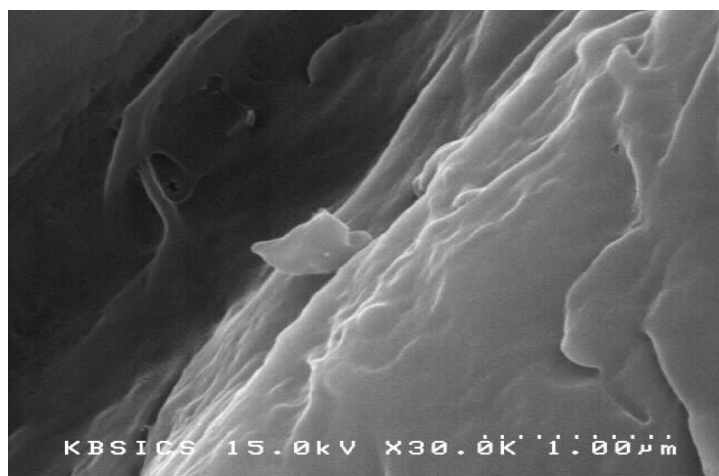

**CHT**

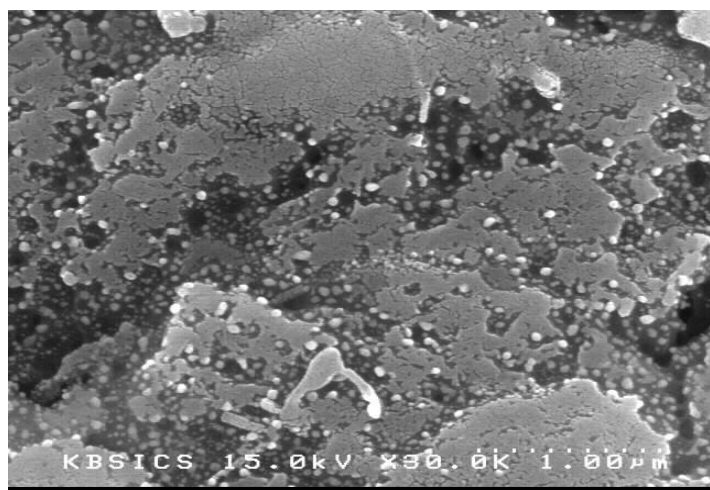

**QCHT**

**Fig. S2.** SEM images of CHT and QCHT
